1       **The evolution and spread of sulfur-cycling enzymes reflect volcanic sulfur**  
2                                   **sources and the redox state of the early Earth**

3  
4  
5                   Katherine Mateos<sup>1, 2†</sup>, Garrett Chappell<sup>1, 3†</sup>, Eva Stüeken<sup>4, 5</sup>, and Rika Anderson<sup>1, 5\*</sup>  
6  
7

8  
9       <sup>1</sup> *Carleton College, Northfield, MN, USA*

10       <sup>2</sup> *Ocean Sciences Department, University of California Santa Cruz, Santa Cruz, CA, USA*

11       <sup>3</sup> *Department of Biochemistry and Biophysics, University of North Carolina at Chapel Hill, Chapel Hill, NC, USA*

12       <sup>4</sup> *University of St. Andrews, School of Earth & Environmental Science, Bute Building, Queen's Terrace, St Andrews, Fife, KY16 9TS,*  
13 *United Kingdom*

14       <sup>5</sup> *NASA NExSS Virtual Planetary Laboratory, University of Washington, Seattle, WA, USA*  
15

16       **\*Corresponding author:**

17       *Rika Anderson*

18       *Carleton College, One North College Street, Northfield, MN, 55057 USA*

19       *507.222.4382*

20       *randerson@carleton.edu*  
21  
22

23       †*These authors contributed equally to this manuscript.*  
24  
25  
26  
27  
28  
29  
30  
31  
32  
33  
34  
35  
36  
37  
38  
39  
40  
41  
42  
43  
44  
45  
46

47 **Abstract**

48

49 The biogeochemical sulfur cycle plays a central role in fueling microbial metabolisms, regulating the redox  
50 state of the Earth, and impacting climate through remineralization of organic carbon. However, traditional  
51 reconstructions of the ancient sulfur cycle based on geochemistry are confounded by ambiguous isotopic  
52 signals, low sulfate concentrations in the Archean ocean, and the isotopic impacts of photolysis acting on  
53 volcanogenic SO<sub>2</sub> gas. Here, we use a phylogenomics approach to ascertain the timing of gene duplication,  
54 loss, and horizontal gene transfer events for sulfur cycling genes across the tree of life. Our results suggest  
55 that metabolisms using sulfate reduction and sulfide oxidation emerged early in life's evolution, but metabolic  
56 pathways involving thiosulfate and the *srx* pathway proliferated across the tree of life only after the Great  
57 Oxidation Event, suggesting enhanced recycling of sulfur with increasing oxygen levels in the  
58 Paleoproterozoic ocean. Our data go beyond geochemical records by revealing that the manifestations of  
59 geochemical signatures resulted not from the expansion of a single type of organism, but were instead  
60 associated with the expansion of genomic innovation across the tree of life. Moreover, our results provide the  
61 first indication of organic sulfur cycling in the Archean, possibly reflecting the use of methanethiol in  
62 hydrothermal vent habitats. The formation of DMS may have had implications for climate regulation, the  
63 generation of the sulfur MIF signal, and atmospheric biosignatures. Overall, our results provide new insights  
64 into how the biological sulfur cycle evolved in tandem with the redox state of the early Earth.

65

66

67

68 **Teaser**

69 Phylogenomics analyses reveal that the evolution of microbial sulfur metabolisms tracked the redox  
70 state of the early Earth.

71

72

73

74

75

76

77

78

79

80

81

82

83

84

85

86

87

88

89

90

91

## 92 Introduction

93

94 The biogeochemical sulfur cycle has played a crucial role in the evolution of life and surface processes over  
95 geologic time. Dissimilatory metabolisms, including elemental sulfur reduction, sulfate reduction, sulfate  
96 disproportionation, and sulfide oxidation fuel diverse microbes and play a significant role in regulating the  
97 redox state of the Earth (1) (**Figure 1**). For example, the burial of biogenic sulfide in marine sediments may  
98 have contributed to progressive oxygenation of surface environments (2). Conversely, the metabolic  
99 reduction of sulfate is often coupled with the oxidation of organic carbon, a process that accounts for up to  
100 50% of organic carbon mineralization (3). Recent studies have found that the sulfur cycle is intricately  
101 entwined with cycling of other important elements, including nitrogen and various transition metals (4, 5). In  
102 particular, freely dissolved sulfide in seawater, especially during the Proterozoic eon (6), may have impacted  
103 the solubility of essential micronutrients such as molybdenum (7). Thus, a deeper understanding of the  
104 evolution of the biological sulfur cycle can offer important insights into the evolution of other  
105 biogeochemical cycles and the oxidation state of our planet over time.

106

107 Several geochemical studies suggest that sulfur metabolisms were probably among the earliest metabolisms on  
108 the ancient Earth. Early analyses of sulfur isotopes of pyrite and barite in the 3.5 Ga Dresser formation  
109 provided evidence for sulfate reduction in the Archaean era (8). While data from Philippot et al. (9) later  
110 argued that the isotopic fingerprint of the sulfides was more consistent with sulfur disproportionation,  
111 subsequent work supported the original claim (10).

112

113 Since then, several studies have documented isotopic evidence of microbial sulfur cycling in a variety of  
114 Archean environments (e.g. (11–13)). However, this approach has limitations for three reasons: First, the  
115 isotopic signatures of differing sulfur metabolisms are not necessarily distinct enough to be recognizable in  
116 the sedimentary rock record. For example, analysis from the 3.2 Ga Moodies Group in South Africa  
117 confirmed the presence of reductive sulfur cycling, and hinted at the presence of oxidative sulfur cycling (14);  
118 however, the latter could not be unambiguously inferred. Second, the concentration of sulfate in the Archean  
119 ocean was low, possibly as low as 2.5  $\mu\text{M}$  (15), dampening the signal of microbial sulfur isotope fractionation  
120 in the rock record. This challenge was illustrated by analysis of sulfur isotope ratios in a modern sulfate-poor  
121 analog of the Archean ocean, where biological fractionations are muted despite the presence of active  
122 microbial sulfate reduction (15). Third, the Archean sulfur isotope record is famously impacted by  
123 photochemical processes acting on volcanogenic  $\text{SO}_2$  gas in an anoxic atmosphere (16). These photochemical  
124 reactions are recognizable by significant so-called mass-independent isotopic fractionations; however,  
125 distinguishing these from biogenic isotope effects requires analyses of all four stable isotopes of sulfur and  
126 relatively large sample sets (10, 17, 18). Thus, while the geochemical record has produced valuable insight into  
127 sulfur cycling in the Archean, the results can be inconclusive and often cannot distinguish between specific  
128 metabolic pathways.

129

130 Given the significant limitations and uncertainties presented by the geochemical record, pairing geochemical  
131 analysis with top-down phylogenetics approaches can provide a novel perspective into the emergence and  
132 spread of distinct sulfur-cycling microbial metabolisms on the early Earth. Some molecular work has been  
133 conducted to explore the history of microbial sulfur cycling, with a particular focus on dissimilatory sulfate  
134 reduction (19). The enzyme DsrAB is used to both reduce and oxidize sulfite to sulfide in sulfate-reducing  
135 bacteria. The reduction of sulfite by DsrAB is considered the rate-limiting step in the microbial sulfate  
136 reduction pathway. A phylogenetic analysis of DsrAB identified three major clades of the gene: the reductive

137 bacterial type, the oxidative bacterial type, and the reductive archaeal type (19). The reductive archaeal-type  
138 proteins were most deeply rooted within the DsrAB tree, suggesting that the reductive pathway predated the  
139 oxidative one. Furthermore, the oxidative bacterial type DsrAB proteins was found to form a monophyletic  
140 group, suggesting that this protein evolved from a reductive-type ancestor. These data are consistent with low  
141 atmospheric oxygen concentrations on the Archean Earth, where a reductive pathway would be favored, and  
142 they are also in line with geochemical evidence for the early emergence of sulfur/sulfate-reducing bacteria.  
143 However, the authors of that study did not attempt to constrain the timing of these evolutionary events,  
144 making it difficult to draw concrete conclusions about how these proteins evolved in the context of  
145 biogeochemical transitions on the early Earth.

146  
147 One of the biggest questions regarding the evolution of the biological sulfur cycle is how it co-evolved with  
148 the oxygenation of the Earth over time. It is now well established that the Earth's surface underwent a major  
149 transformation at around 2.4 Ga, when atmospheric O<sub>2</sub> levels increased above a threshold of 10<sup>-5</sup> times  
150 present levels, known as the Great Oxidation Event (GOE) (20). As a consequence, volcanism was replaced  
151 by oxidative weathering as the major source of sulfur to the ocean, and the speciation of this new sulfur  
152 source was dominated by sulfate, as opposed to volcanogenic SO<sub>2</sub>, dissolved sulfite, and the photochemical  
153 products S<sub>8</sub> and sulfate (21). Further, O<sub>2</sub> became abundant in surface waters as a potent oxidant of reduced  
154 sulfur species (22). The Archean-Proterozoic transition also witnessed a decline in hydrothermal activity on  
155 the ocean floor (23). Lastly, the deep ocean became fully oxygenated in the Neoproterozoic or early Paleozoic  
156 with the second rise of oxygen, leading to enhanced sulfide oxidation within sediments (24). Geochemical  
157 data show isotopic expressions of these events in the sulfur cycle (1); however, it is so far unknown if these  
158 isotopic signals reflect merely an enhancement of a pre-existing process or true evolutionary innovations.  
159 This question has important implications for cause-effect relationships in Earth system evolution.

160  
161 Previous studies have used phylogenetic approaches to track the birth of specific lineages or genes (e.g. 25,  
162 26); however, the birth of a gene does not necessarily coincide with the time at which the function of that  
163 gene became ecologically important. As genes are horizontally transferred between divergent microbial  
164 lineages, the genes that serve a useful function are the ones most likely to be retained in a genome (27–32).  
165 Thus, an increase in horizontal gene transfer events for a particular gene at a specific point in time likely gives  
166 an indication the gene in question was ecologically important during that time period.

167  
168 To examine the evolution of the biological sulfur cycle over time, we therefore used phylogenomics  
169 approaches to track the timing of duplication, loss, and horizontal gene transfer events for sulfur cycling  
170 genes across a time-calibrated tree of life. This analysis allows us to determine approximately when these  
171 genes first arose and then proliferated across the tree of life on the early Earth. A similar analysis of nitrogen-  
172 cycling genes revealed that nitrogen fixation arose and spread early, while genes related to denitrification from  
173 nitrite arose and spread much later in Earth history (33). Here, we focus on constraining the timing of  
174 duplication, loss, and horizontal gene transfer events for genes related to dissimilatory sulfate reduction and  
175 sulfide oxidation via sulfide, transformations between sulfate and thiosulfate, as well as organic sulfur cycling.

176  
177

## 178 **Results**

179

180 *Construction of species tree and time-calibrated chronogram*

181 We constructed a species tree from an alignment of fifteen universal single-copy ribosomal genes in order to  
182 conduct the phylogenetic reconciliation (**Figure 2**). The resulting tree placed the Eukaryotes within the  
183 Archaeal domain, consistent with a two-domain tree of life, as has been recovered previously using similar  
184 methods (59–61). We constructed chronograms from this species tree using two autocorrelated clock models  
185 (LN and CIR) and one uncorrelated clock model (UGAM). We tested both liberal and conservative fossil  
186 calibration points to construct the molecular clock (**Table 1**; see Methods). The liberal calibration points  
187 returned unrealistic ages for the last universal common ancestor (LUCA), and so were not used for the  
188 remainder of this analysis. Using the conservative calibration points, the LN clock returned a LUCA age of  
189 approximately 4.48 Ga, the CIR clock returned a LUCA age of approximately 4.05 Ga; and the UGAM clock  
190 returned a LUCA age of approximately 3.93 Ga. For the remainder of our analysis we report the results from  
191 the CIR clock in the main text because the autocorrelated CIR results were deemed more realistic than the  
192 autocorrelated LN results, and autocorrelated clock models have previously been shown to outperform  
193 uncorrelated models such as UGAM (48); but all results from the LN and UGAM clocks are reported in the  
194 Supplementary Materials. All Newick files, alignments, and chronograms with error bars have been deposited  
195 in FigShare at <https://figshare.com/account/home#/projects/144267>.

196

#### 197 *Phylogenetic distribution of sulfur-cycling genes*

198 We used AnnoTree (52) to determine the distribution of sulfur-cycling genes across the tree of life. Genes  
199 related to dissimilatory sulfate reduction and sulfide oxidation via sulfite, including *dsr* and *apr* genes, tended  
200 to be fairly widespread across the tree of life: *aprAB* in particular is fairly widespread, occurring in  
201 approximately 47 bacterial and 5–6 archaeal phyla, and *dsrAB* is found in 32 bacterial and 4–5 archaeal phyla.  
202 In contrast, genes related to thiosulfate oxidation/reduction, particularly the *sox* group of genes, were more  
203 phylogenetically restricted, occurring in approximately 14–20 bacterial and 1 archaeal phylum, with the  
204 majority of gene hits restricted to the Proteobacteria superphylum. The exceptions to this rule were *soxB* and  
205 *soxC*, which were much more widespread across the tree of life, occurring in approximately 31–38 bacterial  
206 and 4 archaeal phyla. Finally, the organic sulfur cycling genes *dmdA*, *dmsA*, and *mddA* each displayed a  
207 different phylogenetic distribution: *dmdA* was found in only 13 bacterial and 2 archaeal phyla, restricted  
208 mostly to the Proteobacteria and Actinobacteria; *dmsA* was much more widespread, identified in 43 bacterial  
209 and 6 archaeal phyla, but generally not observed in the Patescibacteria; and *mddA* was similarly widespread,  
210 found in 34 bacterial and 4 archaeal phyla, most noticeably absent from the Patescibacteria and the Firmicutes  
211 phyla.

212

#### 213 *Identification of duplication, loss, and horizontal gene transfer events for sulfur-cycling genes*

214 For the 13 genes of interest, we quantified gene duplication, loss and horizontal gene transfer events using  
215 multiple reconciliation algorithms. Reconciliation was performed by comparing the topology of the maximum  
216 likelihood gene trees for each gene to fossil-calibrated chronograms using three different clock models (CIR,  
217 UGAM, and LN) using the reconciliation programs AnGST (58) and ecceTERA (56). The analyses presented  
218 below focus on results from ecceTERA based on the CIR clock model (see **Table 2**), with replicate analyses  
219 with similar results from ecceTERA using the UGAM and LN clock models as well as results from AnGST  
220 using the CIR, UGAM, and LN models presented in **Supplementary Tables 1-3 and Supplementary**  
221 **Figures 1-3**.

222

223 According to the earliest events identified for each of the genes, reported as the approximate gene birth date  
224 in **Table 3**, the most ancient genes include those involved in dissimilatory sulfate reduction and oxidation:  
225 *dsrAB*, which catalyzes the oxidation and reduction of sulfite and sulfide, and *aprAB*, which catalyzes the

226 oxidation and reduction of adenylyl sulfate (APS) and sulfite. Arising slightly later are the *sox* genes (excluding  
227 *soxX* and *soxY*), which are involved in sulfate and thiosulfate ( $S_2O_3^{2-}$ ) oxidation. The gene *mddA*, involved in  
228 the conversion of methanethiol ( $CH_3SH$ ) to dimethylsulfide ( $(CH_3)_2S$ ), arose slightly later. (See **Figure 1** for a  
229 schematic of the sulfur cycle and the steps catalyzed by each of these genes.) Other than *soxABXZ*, in which  
230 the majority of the events are losses, the gene events are largely dominated by horizontal gene transfers, with  
231 very few gene duplications across all the genes. For the *sox* genes, aside from *soxC*, there appears to be a small  
232 peak in gene transfer/loss/duplication events around 1.5 Ga (Figure 3). *soxC* is different from the rest of the  
233 *sox* genes, having an earlier birth and proliferation while also lacking the early peak. Additionally, *soxC* had  
234 many more gene hits and gene events than the rest of the *sox* genes, and was found in a wider range of  
235 organisms overall.

236  
237 The organic sulfur cycling genes *dmdA* for the conversion of dimethyl sulfide ( $(CH_3)_2S$ , DMS) into  
238 methanethiol ( $CH_3SH$ ) and *dmsA* for conversion between DMS and dimethyl sulfoxide ( $(CH_3)_2SO$ , DMSO)  
239 appeared to be much younger than the genes involved in sulfur oxidation and reduction for energy  
240 metabolism, appearing only at approximately 1.7-1.2 Ga (**Figure 3**). In contrast, *mddA*, involved in the  
241 conversion of methanethiol to DMS, appeared much earlier according to our analyses, at almost 3 Ga.

242

243

## 244 Discussion

245

246 Our analysis of gene duplication, transfer, and loss events for sulfur cycling genes across Earth history  
247 provides insight into the relative timing for the proliferation of these genes across the tree of life, and thus  
248 has implications for when specific sulfur metabolisms became ecologically important. As has been suggested  
249 previously, if a gene is acquired via horizontal gene transfer and retained in the genome, this indicates that the  
250 horizontally transferred gene likely has been selected and retained because it performs a useful ecological  
251 function (27–32, 74). Thus, a rise in horizontal gene transfer events for a specific gene at a given time can  
252 indicate when these genes became favorable or ecologically useful given the conditions of the environment at  
253 that point in Earth's history (33). A similar analysis presented in (33) revealed a gradual shift in the biological  
254 nitrogen cycle over Earth history.

255

256 It is important to note that the patterns across all of the genes presented here show a peak of gene events  
257 around 750 Ma. However, many of these events occurred on long branches terminating in leaves of the  
258 species chronogram, meaning that these specific events could have occurred anywhere on that branch, up to  
259 present day. Due to limitations inherent in species and gene tree reconciliation, the date of each event can  
260 only be confined to the branch of the species tree where it occurred, meaning that it could have happened at  
261 any point in time between the two nodes of that branch. The data reported for events occurring on leaves  
262 reflect the midpoints between the terminus of the leaf and the last node of the leaf, many of which occurred  
263 at approximately 1.5 Ga. Thus, although many events were calculated to have occurred around 750 million  
264 years ago, in reality these events occurred at some point during a prolonged time period that extends to the  
265 present day. Due to these limitations in the data, caution is warranted in interpreting these relatively more  
266 recent gene events, as the calculated dates are rough estimates by necessity. Thus, our analysis of the  
267 histograms of gene events will emphasize relative trends in the frequency of events over time, rather than  
268 focusing on precisely dated events. Additionally, the approximate dates for gene birth events are inferred  
269 based on the earliest event for that gene in the reconciliation, so the birth of that gene occurs prior to the  
270 earliest event by definition.

271  
272 *Dissimilatory sulfur reduction and oxidation*  
273 Metabolisms involving dissimilatory sulfate reduction and sulfide oxidation involve the genes *dsrAB* and  
274 *aprAB*, with adenylyl sulfate (APS) and sulfite as intermediates. Our results indicate that these genes are more  
275 ancient than the *sox* genes and some of the organic cycling genes, beginning to proliferate at around 3 Ga  
276 (**Figure 3**). These results are consistent with geochemical studies suggesting that dissimilatory sulfate  
277 reduction is ancient (8). At that time, the major source of sulfate would have been photochemical oxidation  
278 of volcanic SO<sub>2</sub> gas (12, 16), and dissolution of SO<sub>2</sub> in water would have generated sulfite (21). The reduction  
279 of both sulfate and sulfite could have been coupled to organic matter oxidation, as well as to volcanogenic or  
280 biogenic H<sub>2</sub> oxidation. Reduced forms of sulfur would have been abundant prior to the Great Oxidation  
281 Event, particularly near hydrothermal vent systems (75), and their biological oxidation may have been coupled  
282 to the reduction of Fe<sup>3+</sup> or trace O<sub>2</sub> that occurred locally in the surface ocean. Furthermore, phototrophic  
283 sulfide oxidizers use some of the same genes for sulfide oxidation as chemotrophs, including *sox* and *dsr*  
284 genes (76, 77). Thus our data allow for the possibility that significant sulfide oxidation was carried out at the  
285 sea surface by phototrophic sulfide oxidizers, not requiring other sources of oxidants. The findings that the  
286 *dsrAB* genes have an ancient origin are consistent with phylogenetic results from Wagner et al. 1998, who  
287 used targeted gene sequencing and 16S rRNA sequencing techniques to show that dissimilatory sulfite  
288 reductase genes originated at around 3 Ga (78). Although *aprAB* does not involve sulfide directly, the  
289 production of sulfite from sulfide using the *dsrAB* genes may have prompted the production of APS using  
290 *aprAB*. Previous researchers have theorized that both the *apr* and *dsr* genes were involved in early oxidative  
291 pathways using sulfide in ancient microbial mats around 3 billion years ago (79).

292  
293 *Sulfate-thiosulfate transformations*  
294 The Sox enzyme system is involved in the reduction and oxidation of sulfate and thiosulfate, respectively (80).  
295 A version of this pathway, omitting the SoxCD complex, can also be used to oxidize hydrogen sulfide to  
296 elemental sulfur (1). Our results indicate that, like the other genes included in our analysis, the *sox* genes have  
297 a peak in the number of events at around 750 Ma. While this may be a bioinformatics artifact, it also  
298 coincides with the Neoproterozoic Oxygenation Event (NOE, (20)), where the deep ocean is thought to have  
299 become more pervasively oxygenated. However, most *sox* genes (except for *soxC*) also have an earlier peak at  
300 around 1.5 Ga. While it is unclear why this is the case, it may be related to the fact that *soxC* is not involved in  
301 the alternate *sox* pathway that creates elemental sulfur from sulfide. The *soxC* gene is part of a sulfur  
302 dehydrogenase molybdenum enzyme complex called *soxCD* that catalyzes a six-electron transfer in the middle  
303 of the *sox* sequence, and appears to be reliant on the other enzyme complexes in the *sox* sequence (77, 81).  
304 However, while *soxC* had a different pattern of gene duplication/loss/transfer events through its evolutionary  
305 history compared to the other *sox* genes, it also had considerably more gene hits and gene events than the  
306 other *sox* genes analyzed. *soxC* exists in a wider range of organisms than the rest of the *sox* genes, which were  
307 primarily found in Proteobacteria. We speculate that this pattern may be the result of the gene's relationship  
308 to another gene with a similar function, *soxA*, which has a 26.5% sequence identity to *soxC* (81) and is  
309 similarly widespread across the tree of life. Alternatively, it could indicate a separate function beyond the *sox*  
310 pathway for *soxC* that would require further investigation.

311  
312 Setting aside the complexities around *soxC*, the genes *dsr* and *apr* appear to have arisen earlier than genes  
313 involved in the *sox* complex. The number of gene duplication, loss, and horizontal gene transfer events for  
314 *soxABXYZ* experienced a sharp increase around 2 billion years ago, which approximately coincides with  
315 increasing sulfate availability in the Earth's oceans after the GOE (82). Thiosulfate has an intermediate redox

316 state (S(+II)) between sulfide (S(-II)) and sulfate (S(+VI)) and forms most commonly during microbial sulfide  
317 oxidation (83). Hence the expansion of *srx* genes across the tree of life in the Paleoproterozoic is most  
318 parsimoniously attributed to increasing availability of O<sub>2</sub> and therefore enhanced sulfide oxidation. This  
319 finding is consistent with geochemical evidence for enhanced disproportionation of elemental sulfur in the  
320 mid- to late-Proterozoic (22, 24), as elemental sulfur, like thiosulfate, is an intermediate in microbial sulfide  
321 oxidation. Our data thus indicate that these intermediates became more abundant and thus more favorable  
322 metabolic substrates from the Paleoproterozoic onwards. In other words, these results indicate that the GOE  
323 and NOE indirectly triggered metabolic innovations in the sulfur cycle.

324  
325 The slight delay between the geochemically defined GOE at 2.4 Ga (84) and the peak in the expansion of *srx*  
326 genes could be the result of either delayed oxygen delivery to the deep ocean after the GOE, or a delay in the  
327 reflection of ecological changes in the gene record. A similar pattern has been observed in the diversification  
328 of cyanobacteria, at around 2 Ga, as a delayed reaction to the GOE (85). After this first peak, the number of  
329 gene events decreased over time for a few hundred million years, potentially indicating that this gene  
330 stabilized in a specific set of ecological niches. Today, these genes are mostly found in Proteobacteria across a  
331 range of ecological niches such as deep-sea hydrothermal vents, intertidal flats and marshes, soils, and  
332 brackish lagoons (86).

### 333 334 *Organic sulfur cycling*

335 The organic sulfur cycle involves the biological formation of volatile organic compounds such as dimethyl  
336 sulfide (DMS) and methanethiol. Both *dmdA* and *dmsA*, the key enzymes involved in DMS metabolisms,  
337 appear to be much younger than *mddA*, which converts methanethiol into DMS. The genes *dmdA* and *dmsA*  
338 record their first events at around 1.5 Ga, possibly linked to the rise of eukaryotic algae, whose production of  
339 organic sulfur gasses has been implicated in global cooling in the late Proterozoic (87). In contrast, *mddA* had  
340 already appeared at around 3 Ga, according to our analysis. Thus, our results suggest that bacteria were  
341 capable of generating DMS fairly early in Earth history, possibly with important implications for climate  
342 regulation on the early Earth, because DMS particles are known to act as cloud condensation nuclei with the  
343 effect of cooling the Earth's surface (88). Furthermore, the formation of DMS in the Archean may have had  
344 important implications for the generation of mass independent fractionation (MIF) of sulfur isotopes, which  
345 is abundant in the Archean rock record and thought to reflect photochemical reactions in the anoxic Archean  
346 atmosphere. Volcanogenic SO<sub>2</sub> is generally thought to have been the most important sulfur gas in the  
347 Archean (89); however, the potential role of organic gasses has been considered in theoretical studies (90, 91).  
348 Our results may thus be the first tentative evidence that such organic sulfur gasses were indeed produced on  
349 the Archean Earth and may therefore be important to consider in the interpretation of MIF records.

350  
351 Modern sources of naturally occurring methanethiol (the substrate for DMS formation) include decaying  
352 organic matter and the breakdown of the algal metabolite DMSP (dimethylsulfoniopropionate, C<sub>5</sub>H<sub>10</sub>O<sub>2</sub>S).  
353 On the early Earth, hydrothermal vents may have been an important source of methanethiol (92).  
354 Interestingly, thiolated organic compounds from hydrothermal vents have been invoked as key substrates in  
355 the evolution of metabolic pathways (specifically the acetyl-CoA pathway) leading to the origin of life (93).  
356 Theoretical calculations suggest that millimolar concentrations of methanethiol may be generated abiotically  
357 from H<sub>2</sub>, CO<sub>2</sub> and H<sub>2</sub>S in hydrothermal settings (94). The antiquity of the *mdd* gene may thus be indirect  
358 evidence for the importance of hydrothermal substrates in the origin and early evolution of the biosphere.  
359 Moreover, volatile organic sulfur compounds such as DMS are important as potential remotely detectable  
360 biosignatures, because they can conceivably be detected on other planets with an anoxic biosphere using



361 analysis of the spectral signatures of the planet's atmosphere (95). Our results thus suggest that Earth's  
362 earliest biosphere may potentially have been detectable through this technique.

363  
364 Shifts in the biological sulfur cycle have a profound impact on the global carbon cycle and Earth's climate,  
365 and are closely tied to the redox state of the Earth. Our results confirm previous geochemical results  
366 suggesting that microbial energy acquisition via sulfate reduction and possibly sulfide oxidation emerged early  
367 in Earth history, and they indicate that metabolisms involving intermediates such as thiosulfate proliferated  
368 across the tree of life only after the Paleoproterozoic Great Oxidation Event, as the Earth's ocean and  
369 atmosphere became more oxidizing. However, our analysis goes beyond the geochemical records, because  
370 our data reveal that the expressions of these geochemical signatures were not merely the result of  
371 preservation or expansion of a single organism but instead caused by the radiation of genomic innovations  
372 across the tree of life. Furthermore, our analysis provides the first indication for organic sulfur cycling in the  
373 Archean, possibly capitalizing on methanethiol generated in hydrothermal vent environments. The formation  
374 of DMS from methanethiol in the Archean may have had important implications for global climate as well as  
375 for the generation of the sulfur MIF signal during photolysis in the atmosphere.

376  
377

## 378 **Methods**

379

### 380 *Genome selection and construction of species tree*

381 To construct the species tree, we included one representative genome from each bacterial and archaeal order,  
382 based on GTDB taxonomy (34, 35). Some eukaryotic genomes were also included to ensure a robust tree  
383 topology, but the focus of the study was on sulfur cycling genes within bacterial and archaeal genomes.  
384 GToTree (36) was applied to identify and align single-copy universal ribosomal genes from the genomes we  
385 selected. The concatenated gene alignments were created from a set of fifteen universal single-copy genes  
386 (37), and we excluded genomes with fewer than half of the single-copy genes. Briefly, the GToTree workflow  
387 used prodigal (38) to predict genes on input genomes, then identified genes with HMMER3 v3.2.2 (39),  
388 individually aligned genes with MUSCLE v5.1 (40), trimmed the alignment with trimal v1.4.rev15 (41), and  
389 concatenated aligned genes with FastTree2 v2.1.1 (42). The resulting alignment was used to construct a  
390 phylogeny using RAxML v. 8.2.9 (43) with 100 rapid bootstraps using the PROTGAMMALG model of  
391 evolution as per (37). The root of the tree was placed in the bacterial domain (44). The resulting tree contains  
392 871 genomes, including 777 bacterial, 80 archaeal, and 14 eukaryotic genomes.

393

### 394 *Construction of time-calibrated chronogram*

395 The species tree was converted to a chronogram using Phylobayes (45). We tested two separate sets of  
396 calibration points, one conservative (which represents the earliest date for which there is the most consensus  
397 for a given event based on the current scientific literature) and one liberal (which represents the earliest date  
398 for which there is any evidence of a given event based on the current scientific literature) to test the sensitivity  
399 of methodology (Table 1). The root age was set via a normally distributed gamma root prior according to  
400 calibration points in Table 1 with a standard deviation set to 200 million years, consistent with previous  
401 studies (26).

402

403 To generate chronograms, we tested three different clock models: autocorrelated log normal (LN) (46),  
404 uncorrelated gamma multiplier (UGAM) (47), and the autocorrelated CIR process (48). For each model and  
405 set of calibration points, two chains were run concurrently and were compared as a test of convergence. We

406 analyzed convergence using the tracecomp program in Phylobayes, requiring an effective size >100 and a  
407 maximum difference between chains of <0.3. Each chain was run for >60,000 cycles. Chronograms were  
408 generated using the readdiv function in Phylobayes, discarding the first 2500 cycles as a burn in.

409

#### 410 *Identification of sulfur cycling genes and construction of gene trees*

411 We identified sulfur cycling genes of interest using the sulfur metabolism pathway on the Kyoto  
412 Encyclopedia of Genes and Genomes (KEGG) (49–51). In line with previous genomic studies of the sulfur  
413 cycle, we analyzed dissimilatory sulfate reduction/sulfide oxidation genes (*aprAB*, *dsrAB*) (Anantharaman et  
414 al. 2018) and thiosulfate oxidizing/sulfate reducing genes (*srxABCXYZ*) (Canfield et al. 2010). Though the *sat*  
415 gene catalyzes the first step of dissimilatory sulfur cycling, we excluded this gene from our study because it is  
416 also used in other metabolic pathways that were not of specific interest here. We also examined genes that  
417 were involved in the production of volatile organic sulfur compounds, including methanethiol, dimethyl  
418 sulfoxide and dimethyl sulfide (*mddA*, *dmdA*, *dmsA*). The list of sulfur-cycling genes analyzed here was not  
419 meant to be exhaustive, but rather focused on core genes involved in dissimilatory sulfur oxidation and  
420 reduction for energy acquisition as well as select genes involved in organic sulfur cycling.

421

422 For consistency in identifying genes across genomes, we used Annotree (52) to identify sulfur cycling genes in  
423 microbial genomes using KEGG orthology numbers as queries (**Table 2**). We limited our analysis to the core  
424 dissimilatory sulfur cycling and thiosulfate reduction and oxidation genes that were included in the Annotree  
425 database. It is important to note that some metabolic pathways use the same genes for catalyzing oxidation  
426 and reduction reactions, and thus cannot be distinguished using these methods: for example, the *srx* operon is  
427 involved in both thiosulfate oxidation and sulfur disproportionation. The default Annotree settings  
428 (minimum 30% identity, maximum e-value of  $10^{-5}$ , minimum 70% subject and query alignment) were applied  
429 for identifying genes in genomes. Annotree output was curated to only include genes from genomes within  
430 our species tree. Note that although eukaryotic genomes were included in the species tree to ensure accurate  
431 topology, AnnoTree does not include eukaryotic phyla in the gene distribution search, and so eukaryotic  
432 genes were excluded from this analysis. The number of hits for each gene can be found in **Table 2**. These  
433 genes were aligned using MUSCLE v3.8.31 (40) then trimmed using TrimAl v.1.3 (41) with the -automated1  
434 option as implemented in Phylemon2 (53). All gene phylogenies were constructed using RAxML-NG v. 0.9.0  
435 (54). The model of evolution was determined by the Model Selection tool implemented in IQ-TREE 2 (55)  
436 with default settings. Trees were run with at least 1000 bootstraps or until the MRE-based bootstrapping test  
437 implemented by RAxML-NG fell below a cutoff of 0.03. The number of bootstraps used for each gene tree is  
438 reported in **Table 2**. In some cases, we used fewer bootstraps than required to reach convergence when  
439 performing reconciliation with ecceTERA due to computational limitations. These are noted in **Table 2**.

440

#### 441 *Reconciliation of gene trees with species chronogram with ecceTERA*

442 Gene trees and species trees were reconciled using ecceTERA v1.2.5 (56) to identify gene loss, duplication,  
443 and transfer events. We used the default settings implemented in ecceTERA and amalgamated the gene trees  
444 (amalgamate=true). The output was configured to recPhyloXML format (57) with the option  
445 “recPhyloXML.reconciliation=true”. Reconciliation analyses were performed on fully dated species trees and  
446 full sets of gene tree bootstraps where computational limits allowed (see **Table 3** for bootstrap information).  
447 Using a combination of custom Python scripts developed for this project (provided on GitHub at  
448 <https://github.com/carleton-spacehogs/sulfur>) and scripts provided in Duchemin et al. 2018, we calculated  
449 the mean date for each event based on the midpoints of the two 95% confidence intervals that defined the  
450 nodes of the branch on which the event occurred. Distributions of the gene event data produced from

451 ecceTERA were subsequently compared to distribution data of the gene event data produced from AnGST  
452 (58) (see Supplemental Materials) to ensure the results were not dependent on the reconciliation algorithm.  
453

454 It is important to consider the limitations inherent in dating each of these gene events. The phylogenetic  
455 reconciliation identifies branches on which events occurred, and thus there is no way to determine when on a  
456 given branch a specific gene event occurred. Combined with the inherent error associated with dating events  
457 on chronograms dating back billions of years, estimates of when gene events occurred should not be taken as  
458 absolute dates. Instead, we emphasize the relative timing of these events. By examining the distributions of  
459 when specific gene events occurred, we are able to better understand the relative timing of when specific  
460 metabolisms became ecologically significant.

## 461 References

- 462 1. D. A. Fike, A. S. Bradley, C. V. Rose, Rethinking the Ancient Sulfur Cycle. *Annual Review of Earth and*  
463 *Planetary Sciences*. **43** (2015), pp. 593–622.
- 464 2. A. J. Krause, B. J. W. Mills, S. Zhang, N. J. Planavsky, T. M. Lenton, S. W. Poulton, Stepwise  
465 oxygenation of the Paleozoic atmosphere. *Nat. Commun.* **9**, 4081 (2018).
- 466 3. B. B. Jørgensen, Mineralization of organic matter in the sea bed—the role of sulphate reduction. *Nature*.  
467 **296** (1982), pp. 643–645.
- 468 4. D. E. Canfield, F. J. Stewart, B. Thamdrup, L. De Brabandere, T. Dalsgaard, E. F. Delong, N. P.  
469 Revsbech, O. Ulloa, A cryptic sulfur cycle in oxygen-minimum-zone waters off the Chilean coast. *Science*.  
470 **330**, 1375–1378 (2010).
- 471 5. V. Boyko, K. Avetisyan, A. Findlay, Q. Guo, X. Yang, A. Pellerin, A. Kamyshny, Biogeochemical cycling  
472 of sulfur, manganese and iron in ferruginous limnic analog of Archean ocean. *Geochimica et Cosmochimica*  
473 *Acta*. **296** (2021), pp. 56–74.
- 474 6. E. A. Sperling, C. J. Wolock, A. S. Morgan, B. C. Gill, M. Kunzmann, G. P. Halverson, F. A.  
475 Macdonald, A. H. Knoll, D. T. Johnston, Statistical analysis of iron geochemical data suggests limited  
476 late Proterozoic oxygenation. *Nature*. **523** (2015), pp. 451–454.
- 477 7. C. T. Reinhard, N. J. Planavsky, L. J. Robbins, C. A. Partin, B. C. Gill, S. V. Lalonde, A. Bekker, K. O.  
478 Konhauser, T. W. Lyons, Proterozoic ocean redox and biogeochemical stasis. *Proc. Natl. Acad. Sci. U. S.*  
479 *A*. **110**, 5357–5362 (2013).
- 480 8. Y. Shen, R. Buick, D. E. Canfield, Isotopic evidence for microbial sulphate reduction in the early  
481 Archean era. *Nature*. **410**, 77–81 (2001).
- 482 9. P. Philippot, M. Van Zuilen, K. Lepot, C. Thomazo, J. Farquhar, M. J. Van Kranendonk, Early  
483 Archean Microorganisms Preferred Elemental Sulfur, Not Sulfate. *Science*. **317** (2007), pp. 1534–1537.
- 484 10. Y. Ueno, S. Ono, D. Rumble, S. Maruyama, Quadruple sulfur isotope analysis of ca. 3.5Ga Dresser  
485 Formation: New evidence for microbial sulfate reduction in the early Archean. *Geochimica et Cosmochimica*  
486 *Acta*. **72** (2008), pp. 5675–5691.
- 487 11. I. Zhelezinskaia, A. J. Kaufman, J. Farquhar, J. Cliff, Large sulfur isotope fractionations associated with  
488 Neoproterozoic microbial sulfate reduction. *Science*. **346**, 742–744 (2014).
- 489 12. D. L. Roerdink, P. R. D. Mason, J. Farquhar, T. Reimer, Multiple sulfur isotopes in Paleoproterozoic barites  
490 identify an important role for microbial sulfate reduction in the early marine environment. *Earth and*  
491 *Planetary Science Letters*. **331-332** (2012), pp. 177–186.
- 492 13. N. McLoughlin, E. G. Grosch, M. R. Kilburn, D. Wacey, Sulfur isotope evidence for a Paleoproterozoic  
493 subseafloor biosphere, Barberton, South Africa. *Geology*. **40** (2012), pp. 1031–1034.
- 494 14. S. Nabhan, J. Marin-Carbonne, P. R. D. Mason, C. Heubeck, In situ S-isotope compositions of sulfate  
495 and sulfide from the 3.2 Ga Moodies Group, South Africa: A record of oxidative sulfur cycling.  
496 *Geobiology*. **18**, 426–444 (2020).
- 497 15. S. A. Crowe, G. Paris, S. Katsev, C. Jones, S.-T. Kim, A. L. Zerkle, S. Nomosatryo, D. A. Fowle, J. F.  
498 Adkins, A. L. Sessions, J. Farquhar, D. E. Canfield, Sulfate was a trace constituent of Archean seawater.

- 499 *Science*. **346**, 735–739 (2014).
- 500 16. J. Farquhar, H. Bao, M. Thiemens, Atmospheric Influence of Earth’s Earliest Sulfur Cycle. *Science*. **289**  
501 (2000), pp. 756–758.
- 502 17. A. L. Zerkle, M. W. Claire, S. D. Domagal-Goldman, J. Farquhar, S. W. Poulton, A bistable organic-rich  
503 atmosphere on the Neoproterozoic Earth. *Nature Geoscience*. **5** (2012), pp. 359–363.
- 504 18. J. Farquhar, J. Cliff, A. L. Zerkle, A. Kamysny, S. W. Poulton, M. Claire, D. Adams, B. Harms,  
505 Pathways for Neoproterozoic pyrite formation constrained by mass-independent sulfur isotopes. *Proc. Natl.*  
506 *Acad. Sci. U. S. A.* **110**, 17638–17643 (2013).
- 507 19. A. L. Müller, K. U. Kjeldsen, T. Rattai, M. Pester, A. Loy, Phylogenetic and environmental diversity of  
508 DsrAB-type dissimilatory (bi)sulfite reductases. *ISME J.* **9**, 1152–1165 (2015).
- 509 20. T. W. Lyons, C. T. Reinhard, N. J. Planavsky, The rise of oxygen in Earth’s early ocean and atmosphere.  
510 *Nature*. **506** (2014), pp. 307–315.
- 511 21. M. W. Claire, J. F. Kasting, S. D. Domagal-Goldman, E. E. Stüeken, R. Buick, V. S. Meadows, Modeling  
512 the signature of sulfur mass-independent fractionation produced in the Archean atmosphere. *Geochimica*  
513 *et Cosmochimica Acta*. **141** (2014), pp. 365–380.
- 514 22. D. T. Johnston, B. A. Wing, J. Farquhar, A. J. Kaufman, H. Strauss, T. W. Lyons, L. C. Kah, D. E.  
515 Canfield, Active microbial sulfur disproportionation in the Mesoproterozoic. *Science*. **310**, 1477–1479  
516 (2005).
- 517 23. S. Viehmann, M. Bau, J. Elis Hoffmann, C. Münker, Geochemistry of the Krivoy Rog Banded Iron  
518 Formation, Ukraine, and the impact of peak episodes of increased global magmatic activity on the trace  
519 element composition of Precambrian seawater. *Precambrian Research*. **270** (2015), pp. 165–180.
- 520 24. M. Kunzmann, T. H. Bui, P. W. Crockford, G. P. Halverson, C. Scott, T. W. Lyons, B. A. Wing,  
521 Bacterial sulfur disproportionation constrains timing of Neoproterozoic oxygenation. *Geology*. **45** (2017),  
522 pp. 207–210.
- 523 25. E. S. Boyd, A. D. Anbar, S. Miller, T. L. Hamilton, M. Lavin, J. W. Peters, A late methanogen origin for  
524 molybdenum-dependent nitrogenase. *Geobiology*. **9**, 221–232 (2011).
- 525 26. C. Magnabosco, K. R. Moore, J. M. Wolfe, G. P. Fournier, Dating phototrophic microbial lineages with  
526 reticulate gene histories. *Geobiology*. **16**, 179–189 (2018).
- 527 27. M. L. Coleman, S. W. Chisholm, Ecosystem-specific selection pressures revealed through comparative  
528 population genomics. *Proc. Natl. Acad. Sci. U. S. A.* **107**, 18634–18639 (2010).
- 529 28. J. O. McInerney, A. McNally, M. J. O’Connell, Why prokaryotes have pangenomes. *Nat Microbiol.* **2**,  
530 17040 (2017).
- 531 29. A. Moulana, R. E. Anderson, C. S. Fortunato, J. A. Huber, Selection Is a Significant Driver of Gene  
532 Gain and Loss in the Pangenome of the Bacterial Genus *Sulfurovum* in Geographically Distinct Deep-  
533 Sea Hydrothermal Vents. *mSystems*. **5** (2020), , doi:10.1128/mSystems.00673-19.
- 534 30. M. F. Polz, E. J. Alm, W. P. Hanage, Horizontal gene transfer and the evolution of bacterial and archaeal  
535 population structure. *Trends Genet.* **29**, 170–175 (2013).
- 536 31. O. Popa, E. Hazkani-Covo, G. Landan, W. Martin, T. Dagan, Directed networks reveal genomic barriers

- 537 and DNA repair bypasses to lateral gene transfer among prokaryotes. *Genome Res.* **21**, 599–609 (2011).
- 538 32. V. Daubin, Bacterial Genomes as New Gene Homes: The Genealogy of ORFans in *E. coli*. *Genome*  
539 *Research.* **14** (2004), pp. 1036–1042.
- 540 33. C. Parsons, E. E. Stüeken, C. J. Rosen, K. Mateos, R. E. Anderson, Radiation of nitrogen-metabolizing  
541 enzymes across the tree of life tracks environmental transitions in Earth history. *Geobiology.* **19**, 18–34  
542 (2021).
- 543 34. D. H. Parks, M. Chuvochina, P.-A. Chaumeil, C. Rinke, A. J. Mussig, P. Hugenholtz, A complete  
544 domain-to-species taxonomy for Bacteria and Archaea. *Nat. Biotechnol.* **38**, 1079–1086 (2020).
- 545 35. D. H. Parks, M. Chuvochina, D. W. Waite, C. Rinke, A. Skarshewski, P.-A. Chaumeil, P. Hugenholtz, A  
546 standardized bacterial taxonomy based on genome phylogeny substantially revises the tree of life. *Nat.*  
547 *Biotechnol.* **36**, 996–1004 (2018).
- 548 36. M. D. Lee, GToTree: a user-friendly workflow for phylogenomics. *Bioinformatics.* **35**, 4162–4164 (2019).
- 549 37. L. A. Hug, B. J. Baker, K. Anantharaman, C. T. Brown, A. J. Probst, C. J. Castelle, C. N. Butterfield, A.  
550 W. Hemsdorf, Y. Amano, K. Ise, Y. Suzuki, N. Dudek, D. A. Relman, K. M. Finstad, R. Amundson, B.  
551 C. Thomas, J. F. Banfield, A new view of the tree of life. *Nature Microbiology.* **1** (2016),  
552 doi:10.1038/nmicrobiol.2016.48.
- 553 38. D. Hyatt, G.-L. Chen, P. F. Locascio, M. L. Land, F. W. Larimer, L. J. Hauser, Prodigal: prokaryotic  
554 gene recognition and translation initiation site identification. *BMC Bioinformatics.* **11**, 119 (2010).
- 555 39. S. R. Eddy, Accelerated Profile HMM Searches. *PLoS Comput. Biol.* **7**, e1002195 (2011).
- 556 40. R. C. Edgar, MUSCLE: multiple sequence alignment with high accuracy and high throughput. *Nucleic*  
557 *Acids Res.* **32**, 1792–1797 (2004).
- 558 41. S. Capella-Gutiérrez, J. M. Silla-Martínez, T. Gabaldón, trimAl: a tool for automated alignment trimming  
559 in large-scale phylogenetic analyses. *Bioinformatics.* **25**, 1972–1973 (2009).
- 560 42. M. N. Price, P. S. Dehal, A. P. Arkin, FastTree 2 – Approximately Maximum-Likelihood Trees for Large  
561 Alignments. *PLoS ONE.* **5** (2010), p. e9490.
- 562 43. A. Stamatakis, RAxML version 8: a tool for phylogenetic analysis and post-analysis of large phylogenies.  
563 *Bioinformatics.* **30**, 1312–1313 (2014).
- 564 44. G. P. Fournier, J. P. Gogarten, Rooting the ribosomal tree of life. *Mol. Biol. Evol.* **27**, 1792–1801 (2010).
- 565 45. N. Lartillot, T. Lepage, S. Blanquart, PhyloBayes 3: a Bayesian software package for phylogenetic  
566 reconstruction and molecular dating. *Bioinformatics.* **25**, 2286–2288 (2009).
- 567 46. J. L. Thorne, H. Kishino, I. S. Painter, Estimating the rate of evolution of the rate of molecular  
568 evolution. *Molecular Biology and Evolution.* **15** (1998), pp. 1647–1657.
- 569 47. A. J. Drummond, S. Y. W. Ho, M. J. Phillips, A. Rambaut, Relaxed phylogenetics and dating with  
570 confidence. *PLoS Biol.* **4**, e88 (2006).
- 571 48. T. Lepage, D. Bryant, H. Philippe, N. Lartillot, A general comparison of relaxed molecular clock models.  
572 *Mol. Biol. Evol.* **24**, 2669–2680 (2007).

- 573 49. M. Kanehisa, M. Furumichi, Y. Sato, M. Ishiguro-Watanabe, M. Tanabe, KEGG: integrating viruses and  
574 cellular organisms. *Nucleic Acids Res.* **49**, D545–D551 (2021).
- 575 50. M. Kanehisa, Toward understanding the origin and evolution of cellular organisms. *Protein Sci.* **28**, 1947–  
576 1951 (2019).
- 577 51. M. Kanehisa, S. Goto, KEGG: kyoto encyclopedia of genes and genomes. *Nucleic Acids Res.* **28**, 27–30  
578 (2000).
- 579 52. K. Mandler, H. Chen, D. H. Parks, B. Lobb, L. A. Hug, A. C. Doxey, AnnoTree: visualization and  
580 exploration of a functionally annotated microbial tree of life. *Nucleic Acids Res.* **47**, 4442–4448 (2019).
- 581 53. R. Sanchez, F. Serra, J. Tarraga, I. Medina, J. Carbonell, L. Pulido, A. de Maria, S. Capella-Gutierrez, J.  
582 Huerta-Cepas, T. Gabaldon, J. Dopazo, H. Dopazo, Phylemon 2.0: a suite of web-tools for molecular  
583 evolution, phylogenetics, phylogenomics and hypotheses testing. *Nucleic Acids Research.* **39** (2011), pp.  
584 W470–W474.
- 585 54. A. M. Kozlov, D. Darriba, T. Flouri, B. Morel, A. Stamatakis, RAxML-NG: a fast, scalable and user-  
586 friendly tool for maximum likelihood phylogenetic inference. *Bioinformatics.* **35**, 4453–4455 (2019).
- 587 55. B. Q. Minh, H. A. Schmidt, O. Chernomor, D. Schrempf, M. D. Woodhams, A. von Haeseler, R.  
588 Lanfear, IQ-TREE 2: New Models and Efficient Methods for Phylogenetic Inference in the Genomic  
589 Era. *Mol. Biol. Evol.* **37**, 1530–1534 (2020).
- 590 56. E. Jacox, C. Chauve, G. J. Szöllősi, Y. Ponty, C. Scornavacca, ecceTERA: comprehensive gene tree-  
591 species tree reconciliation using parsimony. *Bioinformatics.* **32**, 2056–2058 (2016).
- 592 57. W. Duchemin, G. Gence, A.-M. Arigon Chifolleau, L. Arvestad, M. S. Bansal, V. Berry, B. Boussau, F.  
593 Chevenet, N. Comte, A. A. Davín, C. Dessimoz, D. Dylus, D. Hasic, D. Mallo, R. Planel, D. Posada, C.  
594 Scornavacca, G. Szöllosi, L. Zhang, É. Tannier, V. Daubin, RecPhyloXML: a format for reconciled gene  
595 trees. *Bioinformatics.* **34**, 3646–3652 (2018).
- 596 58. L. A. David, E. J. Alm, Rapid evolutionary innovation during an Archaean genetic expansion. *Nature.*  
597 **469**, 93–96 (2011).
- 598 59. K. Raymann, C. Brochier-Armanet, S. Gribaldo, The two-domain tree of life is linked to a new root for  
599 the Archaea. *Proc. Natl. Acad. Sci. U. S. A.* **112**, 6670–6675 (2015).
- 600 60. T. A. Williams, C. J. Cox, P. G. Foster, G. J. Szöllősi, T. M. Embley, Phylogenomics provides robust  
601 support for a two-domains tree of life. *Nat Ecol Evol.* **4**, 138–147 (2020).
- 602 61. K. Zaremba-Niedzwiedzka, E. F. Caceres, J. H. Saw, D. Bäckström, L. Juzokaite, E. Vancaester, K. W.  
603 Seitz, K. Anantharaman, P. Starnawski, K. U. Kjeldsen, M. B. Stott, T. Nunoura, J. F. Banfield, A.  
604 Schramm, B. J. Baker, A. Spang, T. J. G. Ettema, Asgard archaea illuminate the origin of eukaryotic  
605 cellular complexity. *Nature.* **541**, 353–358 (2017).
- 606 62. S. J. Mojzsis, G. Arrhenius, K. D. McKeegan, T. M. Harrison, A. P. Nutman, C. R. Friend, Evidence for  
607 life on Earth before 3,800 million years ago. *Nature.* **384**, 55–59 (1996).
- 608 63. J. L. Eigenbrode, K. H. Freeman, Late Archean rise of aerobic microbial ecosystems. *Proc. Natl. Acad.*  
609 *Sci. U. S. A.* **103**, 15759–15764 (2006).
- 610 64. J. M. Wolfe, G. P. Fournier, Horizontal gene transfer constrains the timing of methanogen evolution.  
611 *Nat Ecol Evol.* **2**, 897–903 (2018).

- 612 65. A. Bekker, H. D. Holland, P.-L. Wang, D. Rumble 3rd, H. J. Stein, J. L. Hannah, L. L. Coetzee, N. J.  
613 Beukes, Dating the rise of atmospheric oxygen. *Nature*. **427**, 117–120 (2004).
- 614 66. P. Sánchez-Baracaldo, G. Bianchini, J. D. Wilson, A. H. Knoll, Cyanobacteria and biogeochemical cycles  
615 through Earth history. *Trends Microbiol.* (2021), doi:10.1016/j.tim.2021.05.008.
- 616 67. K. Pang, Q. Tang, J. D. Schiffbauer, J. Yao, X. Yuan, B. Wan, L. Chen, Z. Ou, S. Xiao, The nature and  
617 origin of nucleus-like intracellular inclusions in Paleoproterozoic eukaryote microfossils. *Geobiology*. **11**,  
618 499–510 (2013).
- 619 68. E. J. Javaux, C. P. Marshall, A. Bekker, Organic-walled microfossils in 3.2-billion-year-old shallow-  
620 marine siliciclastic deposits. *Nature*. **463**, 934–938 (2010).
- 621 69. T. M. Gibson, P. M. Shih, V. M. Cumming, W. W. Fischer, P. W. Crockford, M. S. W. Hodgskiss, S.  
622 Wörndle, R. A. Creaser, R. H. Rainbird, T. M. Skulski, G. P. Halverson, Precise age of *Bangiomorpha*  
623 *pubescens* dates the origin of eukaryotic photosynthesis. *Geology*. **46** (2018), pp. 135–138.
- 624 70. N. J. Butterfield, *Bangiomorpha pubescens* n. gen., n. sp.: implications for the evolution of sex,  
625 multicellularity, and the Mesoproterozoic/Neoproterozoic radiation of eukaryotes. *Paleobiology*. **26** (2000),  
626 pp. 386–404.
- 627 71. K. Pang, Q. Tang, L. Chen, B. Wan, C. Niu, X. Yuan, S. Xiao, Nitrogen-Fixing Heterocystous  
628 Cyanobacteria in the Tonian Period. *Curr. Biol*. **28**, 616–622.e1 (2018).
- 629 72. S. Golubic, V. N. Sergeev, A. H. Knoll, Mesoproterozoic Archaeoellipsoides: akinetes of heterocystous  
630 cyanobacteria. *Lethaia*. **28** (1995), pp. 285–298.
- 631 73. G. D. Love, E. Grosjean, C. Stalvies, D. A. Fike, J. P. Grotzinger, A. S. Bradley, A. E. Kelly, M. Bhatia,  
632 W. Meredith, C. E. Snape, S. A. Bowring, D. J. Condon, R. E. Summons, Fossil steroids record the  
633 appearance of Demospongiae during the Cryogenian period. *Nature*. **457**, 718–721 (2009).
- 634 74. C. Burke, P. Steinberg, D. Rusch, S. Kjelleberg, T. Thomas, Bacterial community assembly based on  
635 functional genes rather than species. *Proc. Natl. Acad. Sci. U. S. A.* **108**, 14288–14293 (2011).
- 636 75. S. Sievert, R. Kiene, H. Schulz-Vogt, The Sulfur Cycle. *Oceanography*. **20** (2007), pp. 117–123.
- 637 76. C. Dahl, G. Rákhely, A. S. Pott-Sperling, B. Fodor, M. Takács, A. Tóth, M. Kraeling, K. Gy"orfi, A.  
638 Kovács, J. Tusz, K. L. Kovács, Genes involved in hydrogen and sulfur metabolism in phototrophic  
639 sulfur bacteria. *FEMS Microbiol. Lett.* **180**, 317–324 (1999).
- 640 77. C. G. Friedrich, F. Bardischewsky, D. Rother, A. Quentmeier, J. Fischer, Prokaryotic sulfur oxidation.  
641 *Current Opinion in Microbiology*. **8** (2005), pp. 253–259.
- 642 78. M. Wagner, A. J. Roger, J. L. Flax, G. A. Brusseau, D. A. Stahl, Phylogeny of dissimilatory sulfite  
643 reductases supports an early origin of sulfate respiration. *J. Bacteriol.* **180**, 2975–2982 (1998).
- 644 79. B. Meyer, J. Kuever, Phylogeny of the alpha and beta subunits of the dissimilatory adenosine-5'-  
645 phosphosulfate (APS) reductase from sulfate-reducing prokaryotes – origin and evolution of the  
646 dissimilatory sulfate-reduction pathway. *Microbiology*. **153** (2007), pp. 2026–2044.
- 647 80. B. Meyer, J. F. Imhoff, J. Kuever, Molecular analysis of the distribution and phylogeny of the *soxB* gene  
648 among sulfur-oxidizing bacteria - evolution of the Sox sulfur oxidation enzyme system. *Environ. Microbiol.*  
649 **9**, 2957–2977 (2007).



- 650 81. U. Zander, A. Faust, B. U. Klink, D. de Sanctis, S. Panjikar, A. Quentmeier, F. Bardischewsky, C. G.  
651 Friedrich, A. J. Scheidig, Structural basis for the oxidation of protein-bound sulfur by the sulfur cycle  
652 molybdohemo-enzyme sulfane dehydrogenase SoxCD. *J. Biol. Chem.* **286**, 8349–8360 (2011).
- 653 82. C. L. Blättler, M. W. Claire, A. R. Prave, K. Kirsimäe, J. A. Higgins, P. V. Medvedev, A. E. Romashkin,  
654 D. V. Rychanchik, A. L. Zerkle, K. Paiste, T. Kreitsmann, I. L. Millar, J. A. Hayles, H. Bao, A. V.  
655 Turchyn, M. R. Warke, A. Lepland, Two-billion-year-old evaporites capture Earth’s great oxidation.  
656 *Science*. **360** (2018), pp. 320–323.
- 657 83. B. B. Jørgensen, A. J. Findlay, A. Pellerin, The Biogeochemical Sulfur Cycle of Marine Sediments. *Front.*  
658 *Microbiol.* **10**, 849 (2019).
- 659 84. M. R. Warke, T. Di Rocco, A. L. Zerkle, A. Lepland, A. R. Prave, A. P. Martin, Y. Ueno, D. J. Condon,  
660 M. W. Claire, The Great Oxidation Event preceded a Paleoproterozoic “snowball Earth.” *Proceedings of*  
661 *the National Academy of Sciences*. **117** (2020), pp. 13314–13320.
- 662 85. J. S. Boden, K. O. Konhauser, L. J. Robbins, P. Sánchez-Baracaldo, Timing the evolution of antioxidant  
663 enzymes in cyanobacteria. *Nat. Commun.* **12**, 4742 (2021).
- 664 86. W. Ghosh, B. Dam, Biochemistry and molecular biology of lithotrophic sulfur oxidation by  
665 taxonomically and ecologically diverse bacteria and archaea. *FEMS Microbiol. Rev.* **33**, 999–1043 (2009).
- 666 87. G. Feulner, C. Hallmann, H. Kienert, Snowball cooling after algal rise. *Nature Geoscience*. **8** (2015), pp.  
667 659–662.
- 668 88. R. J. Charlson, J. E. Lovelock, M. O. Andreae, S. G. Warren, Oceanic phytoplankton, atmospheric  
669 sulphur, cloud albedo and climate. *Nature*. **326** (1987), pp. 655–661.
- 670 89. J. Farquhar, J. Savarino, S. Airieau, M. H. Thiemens, Observation of wavelength-sensitive mass-  
671 independent sulfur isotope effects during SO<sub>2</sub> photolysis: Implications for the early atmosphere. *Journal of*  
672 *Geophysical Research: Planets*. **106** (2001), pp. 32829–32839.
- 673 90. I. Halevy, Production, preservation, and biological processing of mass-independent sulfur isotope  
674 fractionation in the Archean surface environment. *Proc. Natl. Acad. Sci. U. S. A.* **110**, 17644–17649  
675 (2013).
- 676 91. Y. Ueno, M. S. Johnson, S. O. Danielache, C. Eskebjerg, A. Pandey, N. Yoshida, Geological sulfur  
677 isotopes indicate elevated OCS in the Archean atmosphere, solving faint young sun paradox. *Proceedings*  
678 *of the National Academy of Sciences*. **106** (2009), pp. 14784–14789.
- 679 92. E. P. Reeves, J. M. McDermott, J. S. Seewald, The origin of methanethiol in midocean ridge  
680 hydrothermal fluids. *Proc. Natl. Acad. Sci. U. S. A.* **111**, 5474–5479 (2014).
- 681 93. W. Martin, M. J. Russell, On the origin of biochemistry at an alkaline hydrothermal vent. *Philos. Trans. R.*  
682 *Soc. Lond. B Biol. Sci.* **362**, 1887–1925 (2007).
- 683 94. M. D. Schulte, K. L. Rogers, Thiols in hydrothermal solution: standard partial molal properties and their  
684 role in the organic geochemistry of hydrothermal environments. *Geochimica et Cosmochimica Acta*. **68**  
685 (2004), pp. 1087–1097.
- 686 95. S. D. Domagal-Goldman, V. S. Meadows, M. W. Claire, J. F. Kasting, Using biogenic sulfur gases as  
687 remotely detectable biosignatures on anoxic planets. *Astrobiology*. **11**, 419–441 (2011).

688

## 689 Acknowledgements

690 We thank Celine Scornavacca for assistance with ecceTERA, and Karthik Anantharaman for advice regarding  
691 the biological sulfur cycle. KM was supported by the Dean of the College Office at Carleton College. Funding  
692 for RA and GC was provided by the Virtual Planetary Laboratory, supported by the NASA Astrobiology  
693 Program under grant 80NSSC18K0829 as part of the Nexus for Exoplanet System Science (NExSS) research  
694 coordination network. EES acknowledges funding from a NERC Frontiers grant (NE/V010824/1).

## 696 Author contributions

697 Conceptualization: REA, EES  
698 Investigation and analysis: KM, GC, REA  
699 Visualization: KM, GC  
700 Supervision: REA, EES  
701 Writing: KM, GC, REA, EES

## 703 Competing interests

704 Authors declare that they have no competing interests.

## 706 Data and materials availability

707 All Newick files, alignments, and chronograms with error bars have been deposited in FigShare at  
708 <https://figshare.com/account/home#/projects/144267>. Python scripts used for this analysis are provided  
709 on GitHub at <https://github.com/carleton-spacehogs/sulfur>.

## 711 Figures and Tables

712  
713 **Table 1.** Fossil calibration points used for calibrating molecular clocks. Calibration points were set as the  
714 hard constraint in Phylobayes, indicating the latest date by which a specific clade must have split. The  
715 “conservative” time points reflect the dates for which there is the most consensus; “liberal” time points  
716 reflect the earliest date reported in the literature.

| Calibration Events                                               | Conservative (Ga) | Liberal (Ga)   |
|------------------------------------------------------------------|-------------------|----------------|
| LUCA (set as root prior)                                         | >3.8 (62)         | >3.8 (62)      |
| Origin of methanogenesis                                         | >2.7 (63)         | >3.51 (64)     |
| Origin of oxygenic photosynthesis                                | >2.45 (65)        | >3.0 (20) (66) |
| Origin of eukaryotes                                             | >1.7 (67)         | >3.2 (68)      |
| Origin of plastids/Rhodophytes diverge                           | >1.05 (69)        | >1.5 (70)      |
| Akinetes diverge from cyanobacteria lacking cell differentiation | >1.0 (71)         | >1.5 (72)      |
| Origin of animals                                                | >0.635 (73)       | >0.635 (73)    |

717 **Table 2.** Sulfur cycling genes analyzed in this study. Number of gene hits indicates the number of genes  
 718 identified among the genomes included in the species tree; IQ-Tree Model indicates the model of evolution  
 719 used for generating the gene tree as determined by IQ-Tree; number of bootstraps indicates the number of  
 720 bootstraps used for reconciling the gene tree with the species tree; number of loss, duplication, and HGT  
 721 events are reported as determined by ecceTERA using the CIR clock model.

| Gene        | KEGG Orthology number | Number of gene hits | Metabolic pathway                         | IQ-Tree Model | Number of Bootstraps | Loss events | Duplication events | HGT events | Total number of events |
|-------------|-----------------------|---------------------|-------------------------------------------|---------------|----------------------|-------------|--------------------|------------|------------------------|
| <i>aprA</i> | K00394                | 110                 | Dissimilatory sulfate oxidation/reduction | LG+I+G4       | 800 (converged)      | 40          | 4                  | 79         | 123                    |
| <i>aprB</i> | K00395                | 103                 | Dissimilatory sulfate oxidation/reduction | LG+I+G4       | 800 (converged)      | 46          | 3                  | 77         | 126                    |
| <i>dsrA</i> | K11180                | 83                  | Dissimilatory sulfate oxidation/reduction | LG+I+G4       | 650 (converged)      | 37          | 2                  | 50         | 89                     |
| <i>dsrB</i> | K11181                | 84                  | Dissimilatory sulfate oxidation/reduction | LG+I+G4       | 1200 (converged)     | 29          | 2                  | 28         | 79                     |
| <i>soxA</i> | K17222                | 40                  | Thiosulfate oxidation/reduction           | LG+I+G4       | 2000 (converged)     | 33          | 3                  | 16         | 52                     |
| <i>soxB</i> | K17224                | 45                  | Thiosulfate oxidation/reduction           | LG+I+G5       | 650 (converged)      | 33          | 4                  | 23         | 60                     |
| <i>soxC</i> | K17225                | 105                 | Thiosulfate oxidation/reduction           | LG+I+G6       | 3000 (converged)     | 32          | 7                  | 78         | 117                    |
| <i>soxX</i> | K17223                | 38                  | Thiosulfate oxidation/reduction           | LG+I+G7       | 4000 (converged)     | 21          | 3                  | 18         | 42                     |
| <i>soxY</i> | K17226                | 38                  | Thiosulfate oxidation/reduction           | LG+I+G8       | 6000 (converged)     | 17          | 2                  | 19         | 38                     |
| <i>soxZ</i> | K17227                | 58                  | Thiosulfate oxidation/                    | LG+G4         | 1000 (not converged) | 32          | 9                  | 26         | 67                     |

|             |        |    |                                 |           |                  |    |    |    |    |
|-------------|--------|----|---------------------------------|-----------|------------------|----|----|----|----|
|             |        |    | reduction                       |           |                  |    |    |    |    |
| <i>dmdA</i> | K17486 | 28 | Volatile organic sulfur cycling | LG+G4     | 2450 (converged) | 1  | 1  | 24 | 26 |
| <i>dmsA</i> | K07306 | 92 | Volatile organic sulfur cycling | LG+G4     | 450 (converged)  | 5  | 11 | 75 | 91 |
| <i>mddA</i> | K21310 | 65 | Volatile organic sulfur cycling | LG+F+I+G4 | 2150 (converged) | 11 | 3  | 52 | 66 |

722

723

724

725

726

727

728

729

730

**Table 3.** Identification of gene loss, duplication, and horizontal gene transfer events according to reconciliation with the chronogram generated using the CIR clock model and conservative calibration points, as identified by ecceTERA. Also shown is the gene birth date, defined here as the latest possible timing for the gene birth based on the earliest event identified for that gene according to ecceTERA.

| Gene        | Loss | Duplication | HGT | Total number of events | Birth Date Range (mya) | Midpoint Birth Date (mya) |
|-------------|------|-------------|-----|------------------------|------------------------|---------------------------|
| <i>aprA</i> | 40   | 4           | 79  | 123                    | 2991.975 - 3304.41     | 3148.192                  |
| <i>aprB</i> | 46   | 3           | 77  | 126                    | 2894.515 - 3088.86     | 2991.687                  |
| <i>dsrA</i> | 37   | 2           | 50  | 89                     | 2894.515 - 3088.86     | 2991.687                  |
| <i>dsrB</i> | 29   | 2           | 28  | 79                     | 2894.515 - 3088.86     | 2991.687                  |
| <i>saxA</i> | 33   | 3           | 16  | 52                     | 2902.415 - 3060.56     | 2981.487                  |
| <i>saxB</i> | 33   | 4           | 23  | 60                     | 2902.415 - 3060.56     | 2981.487                  |
| <i>saxC</i> | 32   | 7           | 78  | 117                    | 2287.77 - 3400.795     | 2844.282                  |
| <i>saxX</i> | 21   | 3           | 18  | 42                     | 1882.185 - 1981.1      | 1931.642                  |
| <i>saxY</i> | 17   | 2           | 19  | 38                     | 1968.43 - 2070.21      | 2019.32                   |
| <i>saxZ</i> | 32   | 9           | 26  | 67                     | 2902.415 - 3060.56     | 2981.487                  |
| <i>dmdA</i> | 1    | 1           | 24  | 26                     | 1106.7795 - 1337.14    | 1221.9597                 |
| <i>dmsA</i> | 5    | 11          | 75  | 91                     | 1650.365 - 1757.72     | 1704.042                  |
| <i>mddA</i> | 11   | 3           | 52  | 66                     | 2902.415 - 3060.56     | 2981.487                  |

731

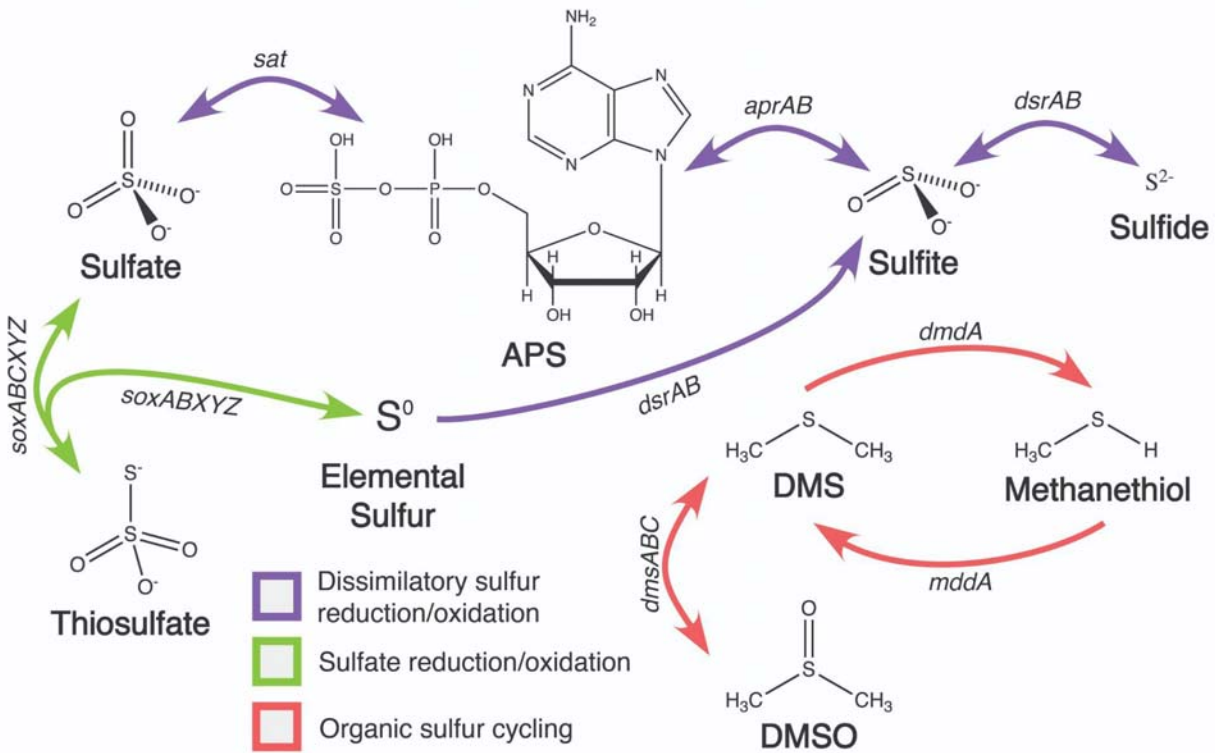

732

733

734 **Figure 1.** Schematic of the biological sulfur cycle, highlighting the genes included in this analysis (note that *sat*

735 was excluded from the analysis because it is also used in several other pathways).

736

737

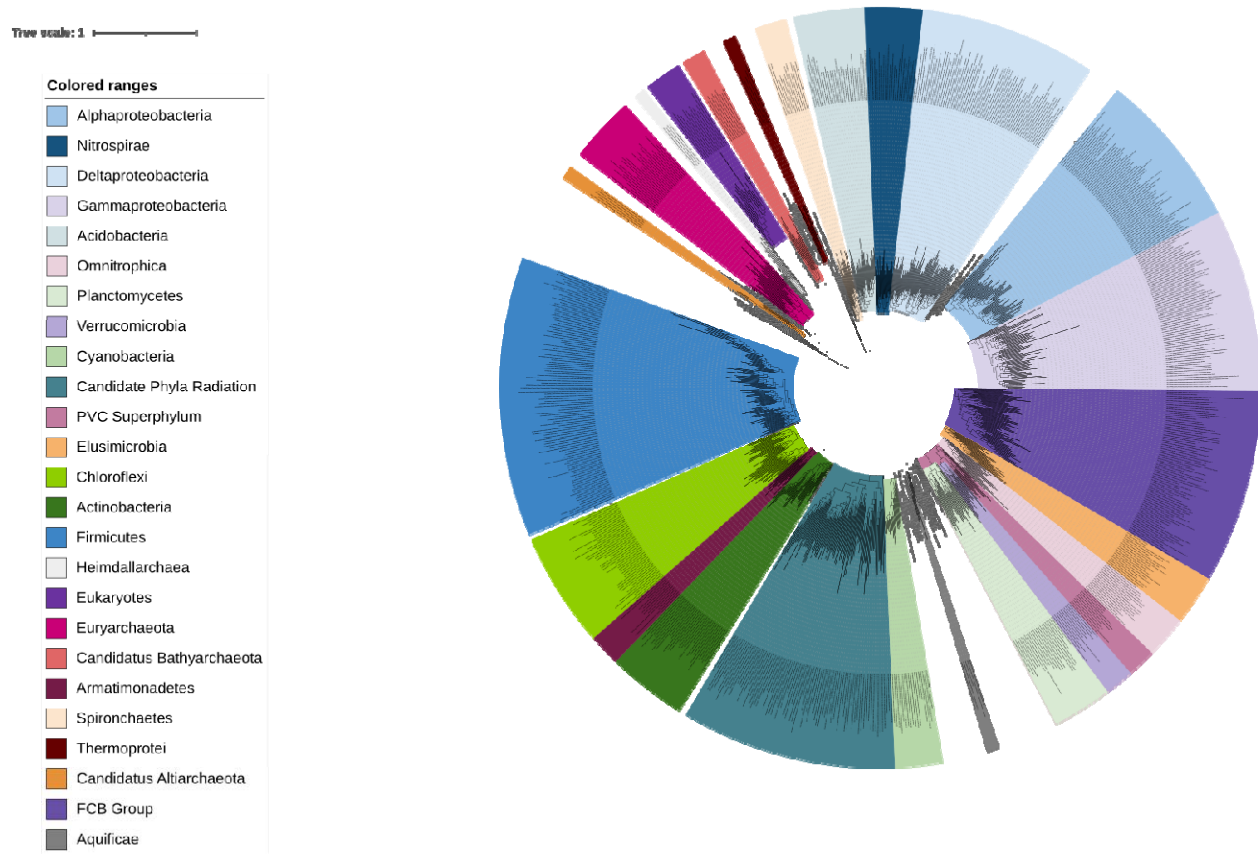

738  
739  
740  
741  
742  
743  
744  
745

**Figure 2.** Tree of life (“species tree”) used for this study. The tree includes 871 genomes in total, including 777 bacterial, 80 archaeal, and 14 eukaryotic genomes. The bacterial and archaeal genomes represent one genome per order based on the GTDB taxonomy.

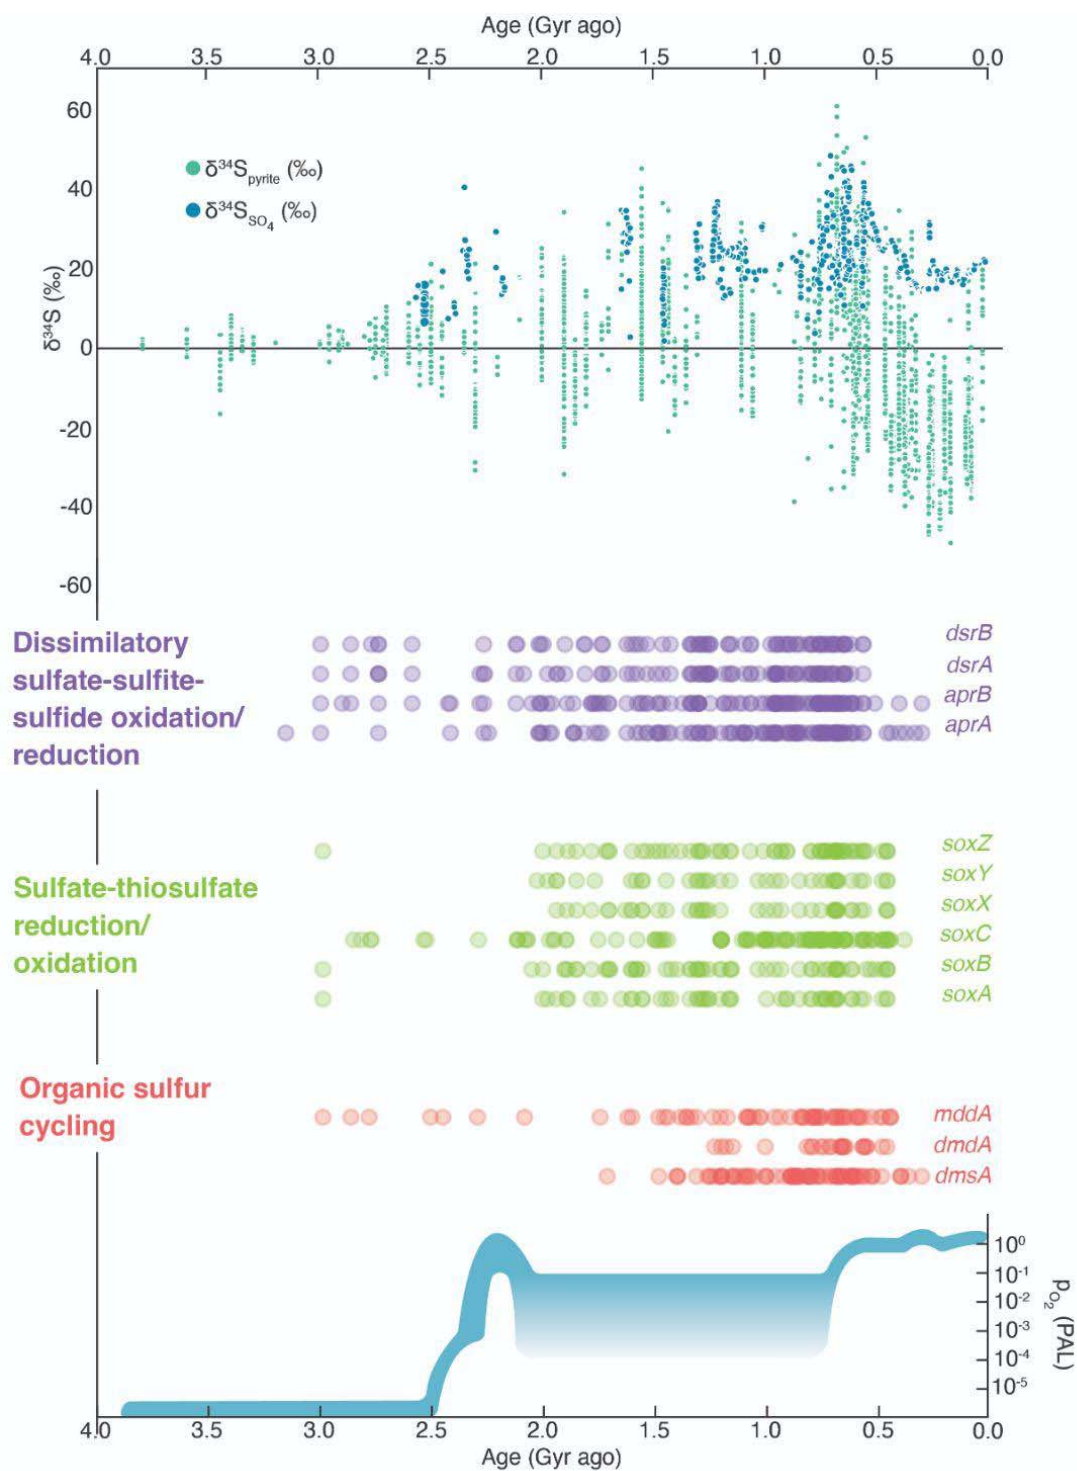

746  
 747 **Figure 3.** Comparison of gene reconciliation results with previously published geochemistry data. The data  
 748 represented here were calculated using the CIR clock model and conservative calibration points. The graph  
 749 above depicting isotopic data was adapted from Fike et al. 2015; the graph below depicting oxygen  
 750 concentrations was adapted from Lyons et al. 2014.

751  
 752
